# Supplementary material for: CFTR Modulation Reduces SARS-CoV-2 Infection in Human Bronchial Epithelial Cells
Source: MDPI journal article supplement (doi:10.3390/cells11081347), 2022-04-15
Supplement: s1 [file s1]

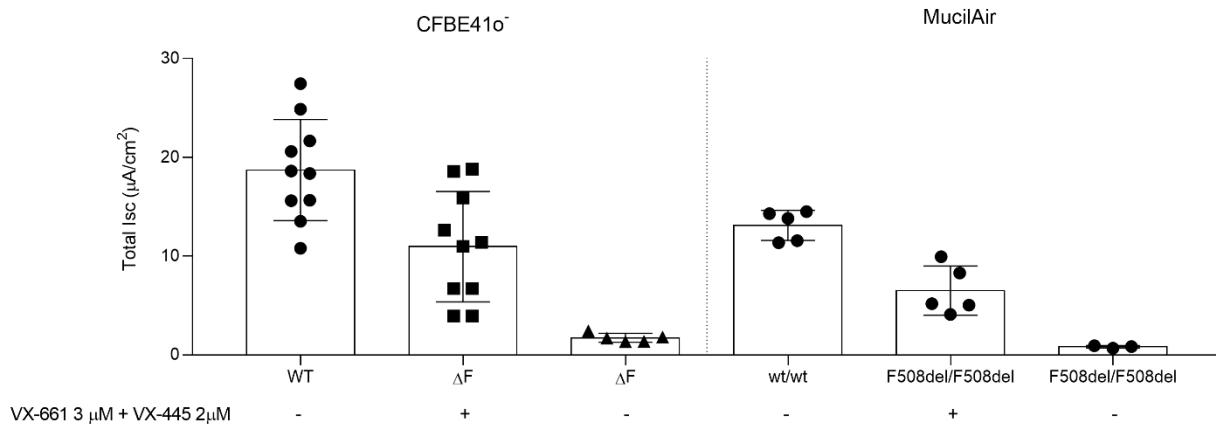

**Supplementary Figure S2.** CFTR function in CFBE41o<sup>-</sup> cells and in MucilAir<sup>TM</sup>. Total Isc values (μA/cm<sup>2</sup>) were calculated and plotted for both WT and ΔF CFBE41o<sup>-</sup> cells and wt/wt-CFTR and F508del/F508del-CFTR MucilAir with and without CFTR-modulators (VX-661+VX-445) correction. For CFBE41o<sup>-</sup> ΔF cells (n=10) the restored function after CFTR-correction was ~50% of CFBE41o<sup>-</sup> WT cells (n=10) as for the F508del/F508del-CFTR MucilAir<sup>TM</sup> (n=5) which rescue was ~45% of wt/wt-CFTR MucilAir<sup>TM</sup> (n=5).
